# Supplementary material for: Synthesis and Structural Characterization of p-Carboranylamidine Derivatives
Source: MDPI journal article supplement (doi:10.3390/molecules28093837), 2023-04-30
Supplement: s1 [file s1]

***Synthesis and structure of the first  
p-carboranylamidine derivatives***

Nicole Harmgarth<sup>1</sup>, Phil Liebing<sup>2</sup>, Volker Lorenz<sup>1</sup>, Felix Engelhardt<sup>2</sup>, Liane Hilfert<sup>1</sup>,  
Sabine Busse<sup>1</sup>, Rüdiger Goldhahn<sup>3</sup> and Frank T. Edelman<sup>3,\*</sup>

- 
- [a] Dr. N. Harmgarth, Dr. P. Liebing, Dr. V. Lorenz, Dr. F. Engelhardt, Dr. L. Hilfert, Dr. S. Busse  
Institut für Chemie  
Otto-von-Guericke-Universität Magdeburg  
Universitätsplatz 2, 39106 Magdeburg, Germany
- [b] Dr. P. Liebing  
Institut für Anorganische und Analytische Chemie  
Friedrich-Schiller-Universität Jena  
Humboldtstr. 8, 07743 Jena, Germany
- [c] Prof. Dr. R. Goldhahn, Prof. Dr. F. T. Edelman  
Institut für Physik  
Otto-von-Guericke-Universität Magdeburg  
Universitätsplatz 2, 39106 Magdeburg, Germany

## Table of content

|                                          | page |
|------------------------------------------|------|
| I. Spectroscopic methods                 | S3   |
| II. IR spectra                           | S4   |
| III. NMR spectra                         | S6   |
| IV. Mass spectra                         | S14  |
| V. Single-crystal X-ray diffraction data | S18  |

## Supporting Information

### I. Spectroscopic methods

IR spectra were measured with a Bruker Vertex 70V spectrometer equipped with a diamond ATR unit between  $4000\text{ cm}^{-1}$  and  $50\text{ cm}^{-1}$ . All NMR spectra ( $^1\text{H}$ ,  $^{13}\text{C}$ ,  $^{29}\text{Si}$ ,  $^{11}\text{B}$ , and  $^7\text{Li}$ ) were recorded in THF- $d_8$  solutions on a Bruker DPX 400 spectrometer. Mass spectra were measured on a MAT 95 apparatus (EI, 70 eV).

## Supporting Information

### II. IR spectra

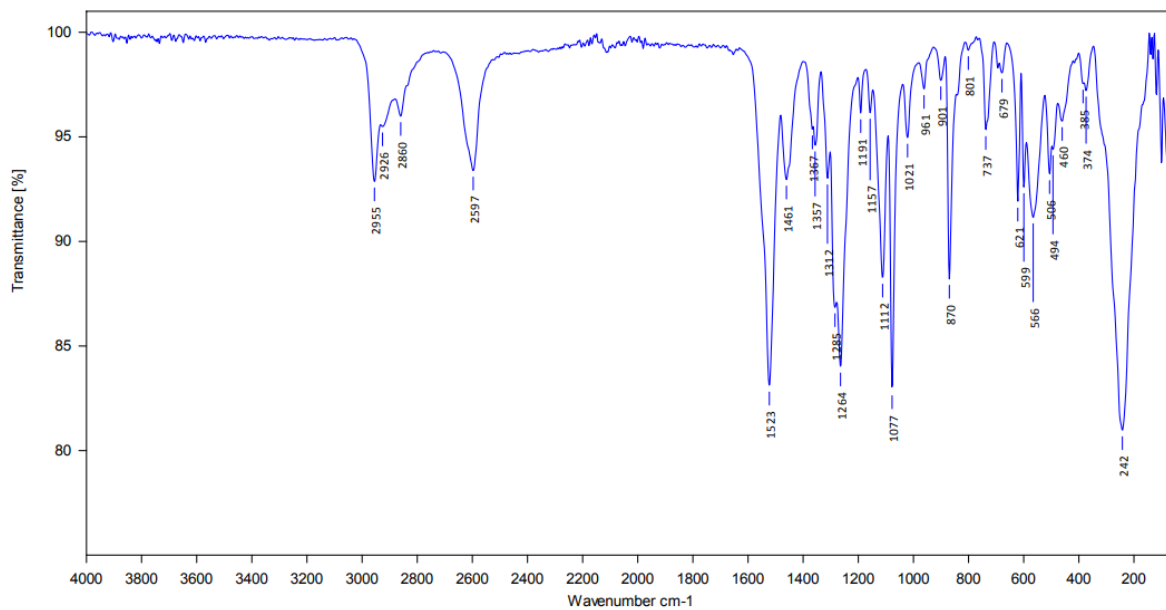

**Fig. S1:** IR spectrum of compound 2

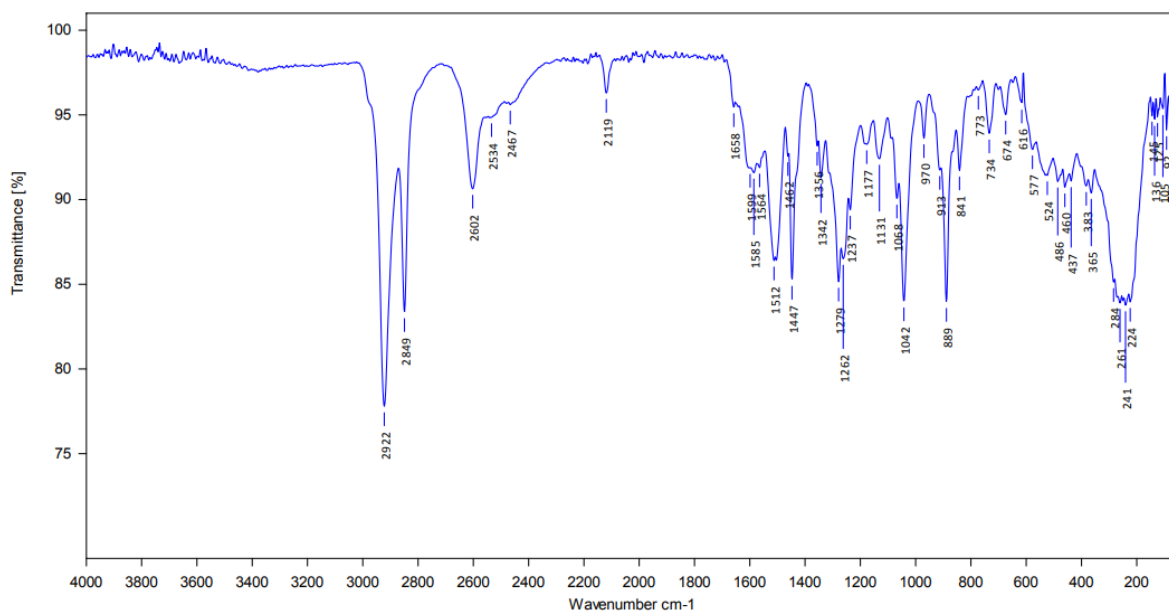

**Fig. S2:** IR spectrum of compound 3

## Supporting Information

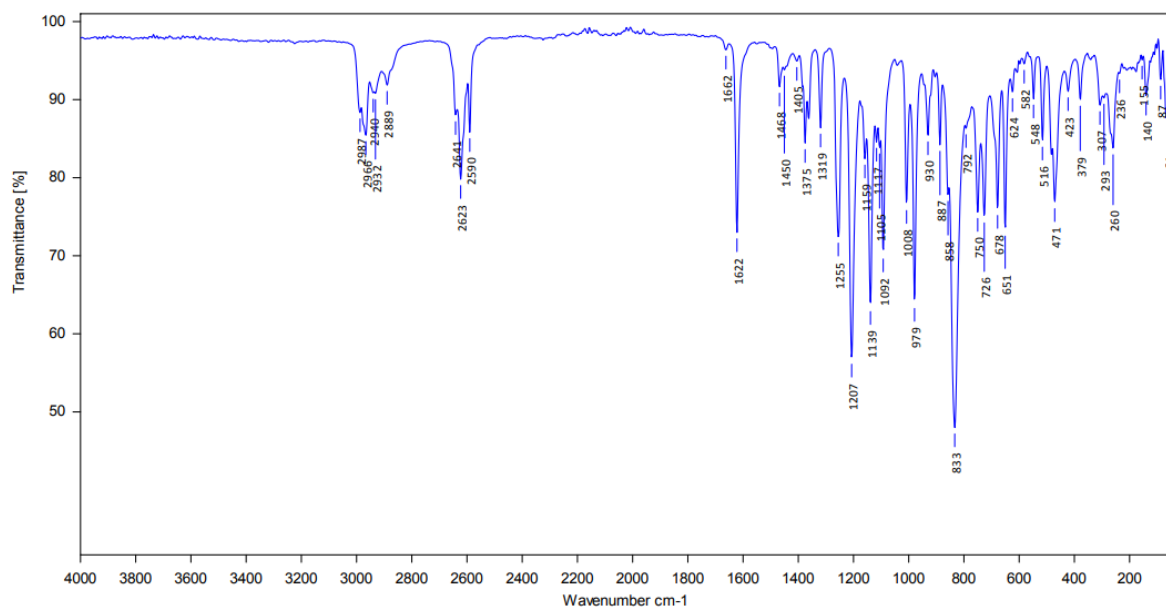

**Fig. S3:** IR spectrum of compound **4**

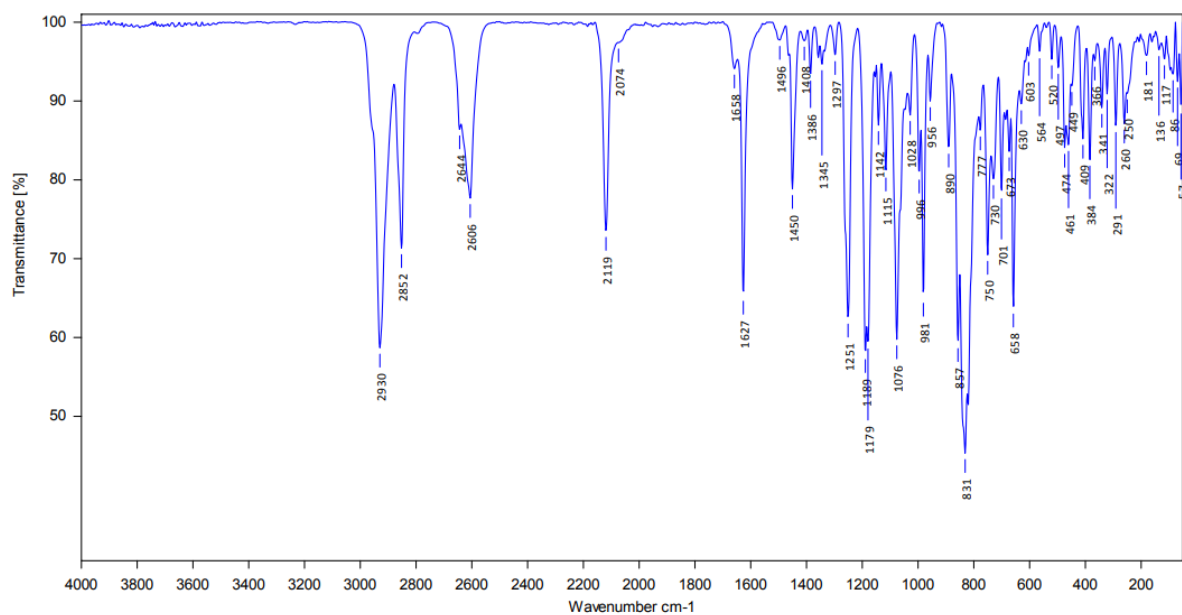

**Fig. S4:** IR spectrum of compound **5**

## III. NMR spectra

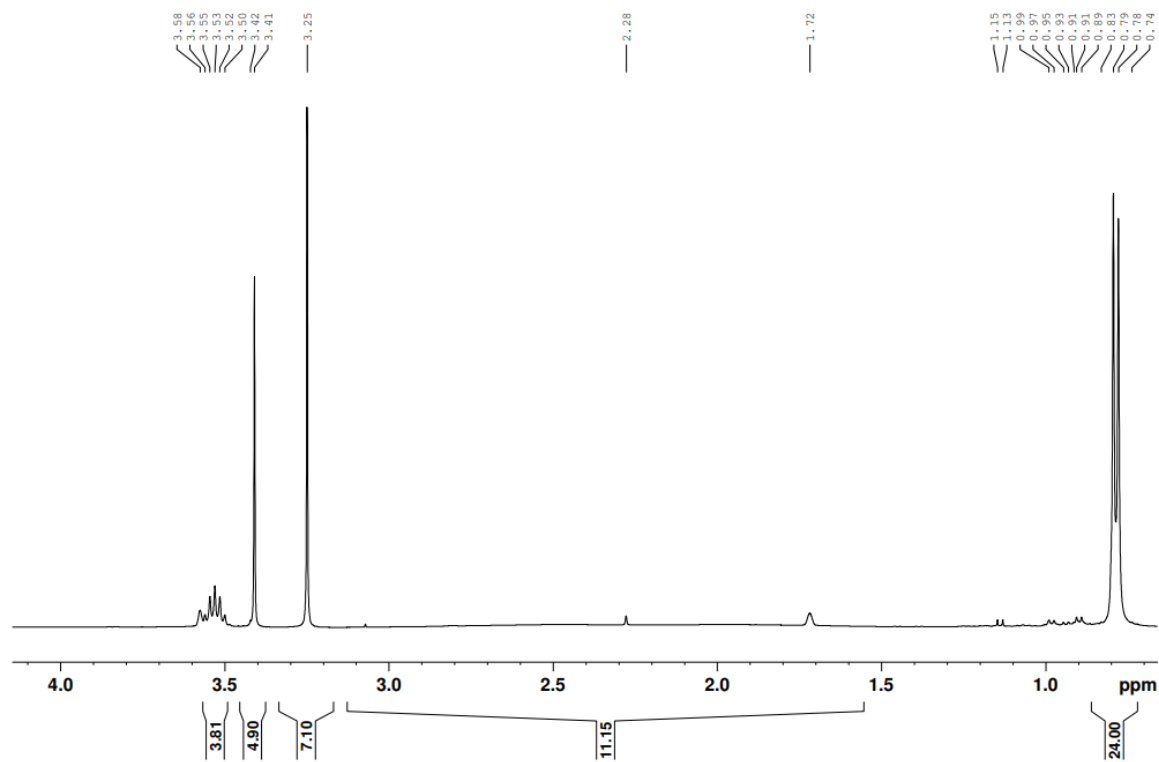Fig. S5: <sup>1</sup>H NMR spectrum of compound 2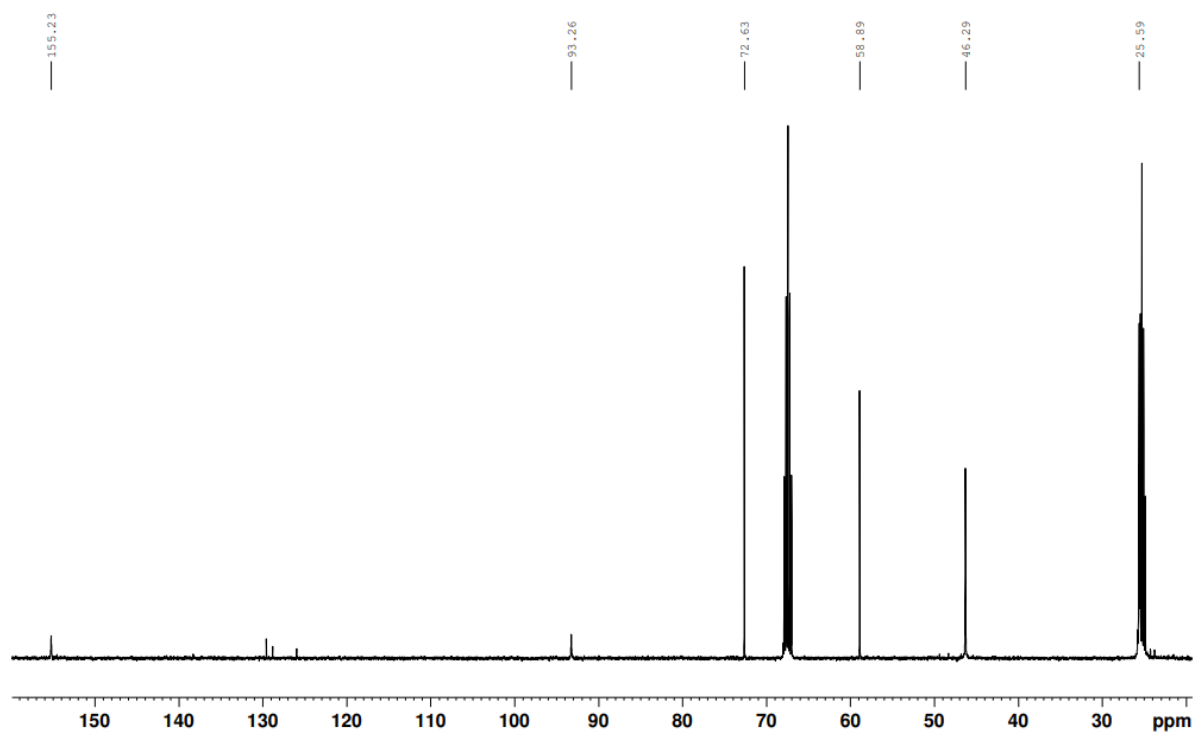Fig. S6: <sup>13</sup>C NMR spectrum of compound 2

## Supporting Information

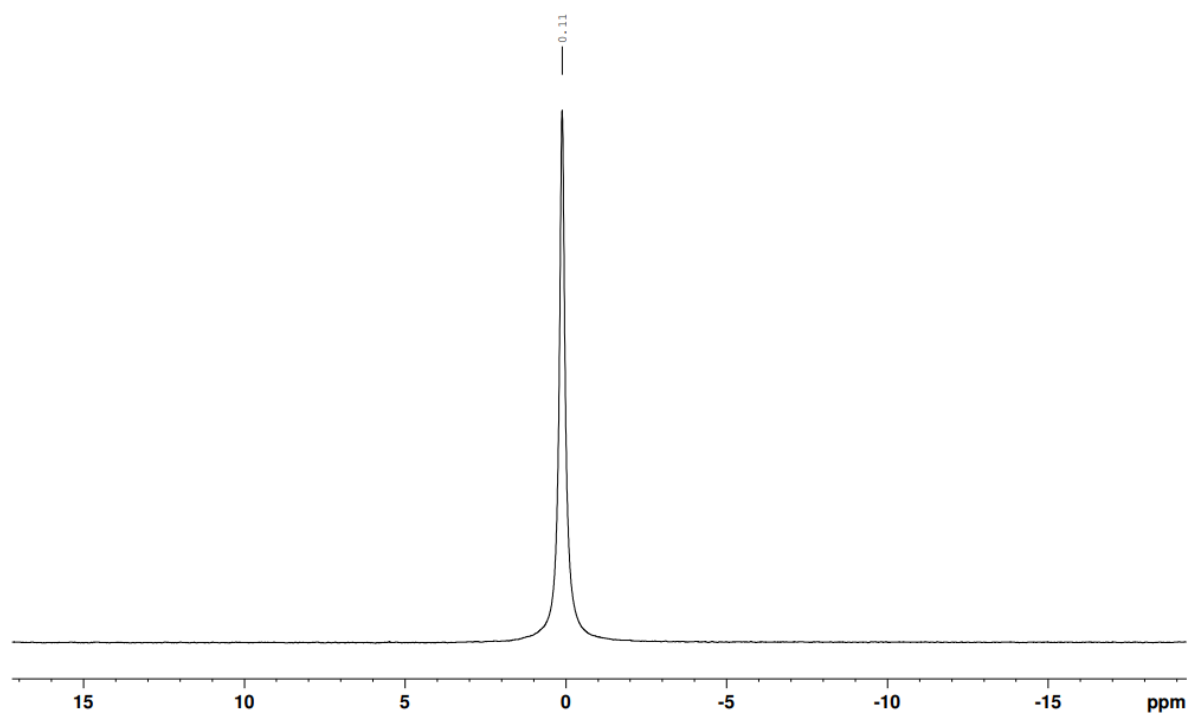

**Fig. S7:**  $^7\text{Li}$  NMR spectrum of compound **2**

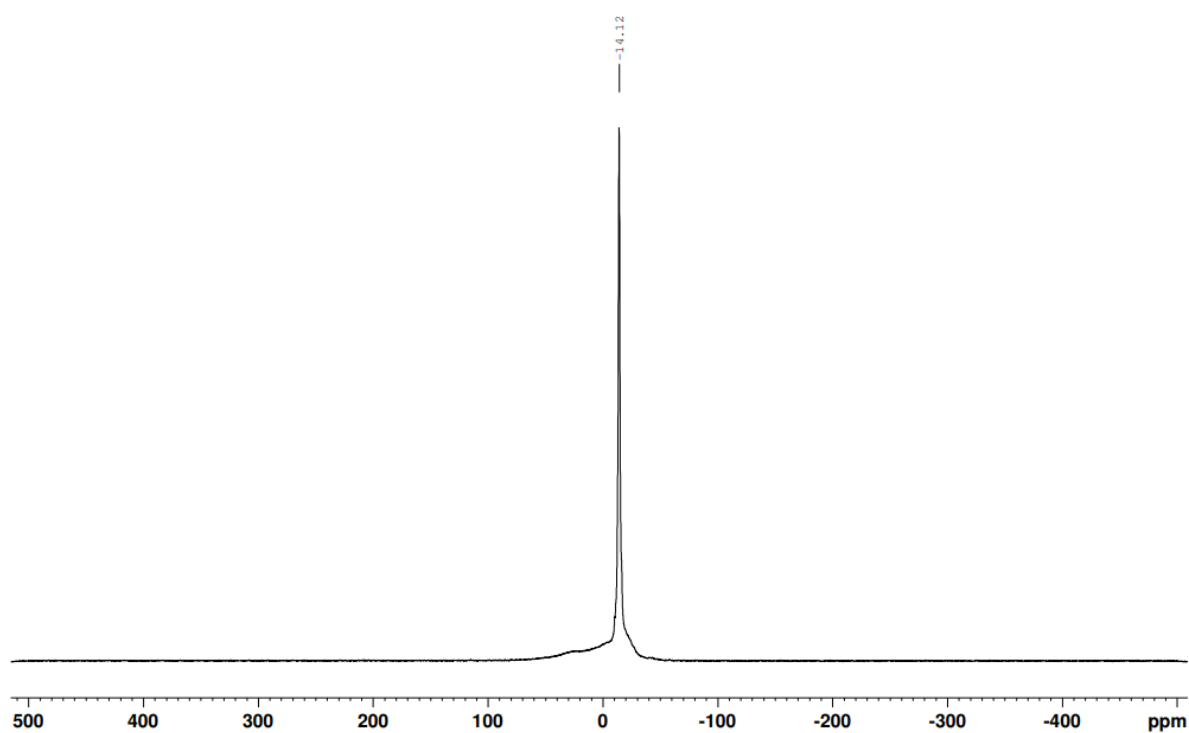

**Fig. S8:**  $^{11}\text{B}$  NMR spectrum of compound **2**

## Supporting Information

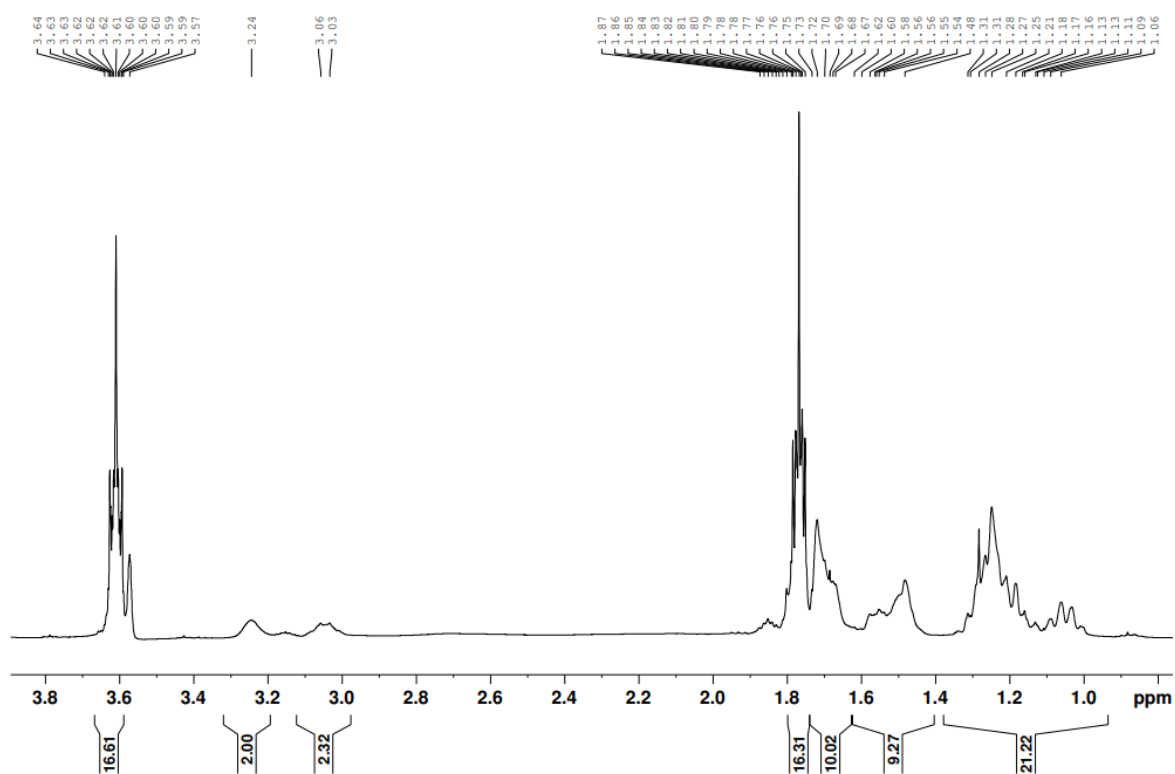

**Fig. S9:**  $^1\text{H}$  NMR spectrum of compound **3**

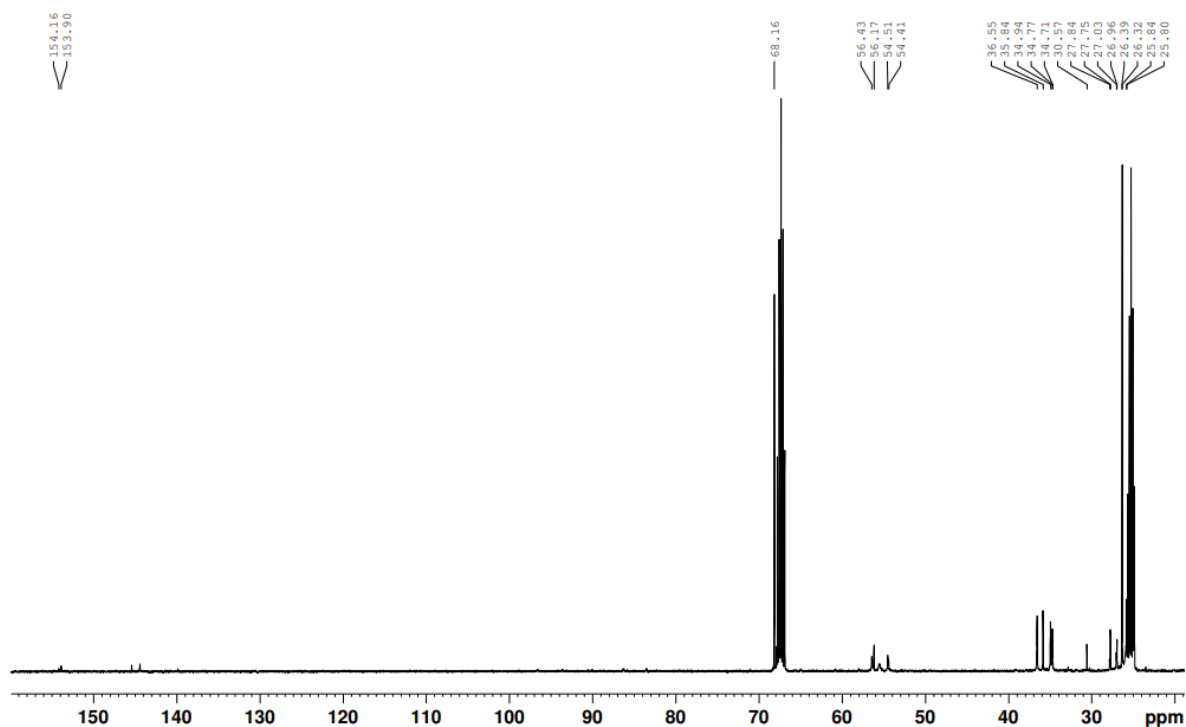

**Fig. S10:**  $^{13}\text{C}$  NMR spectrum of compound **3**



## Supporting Information

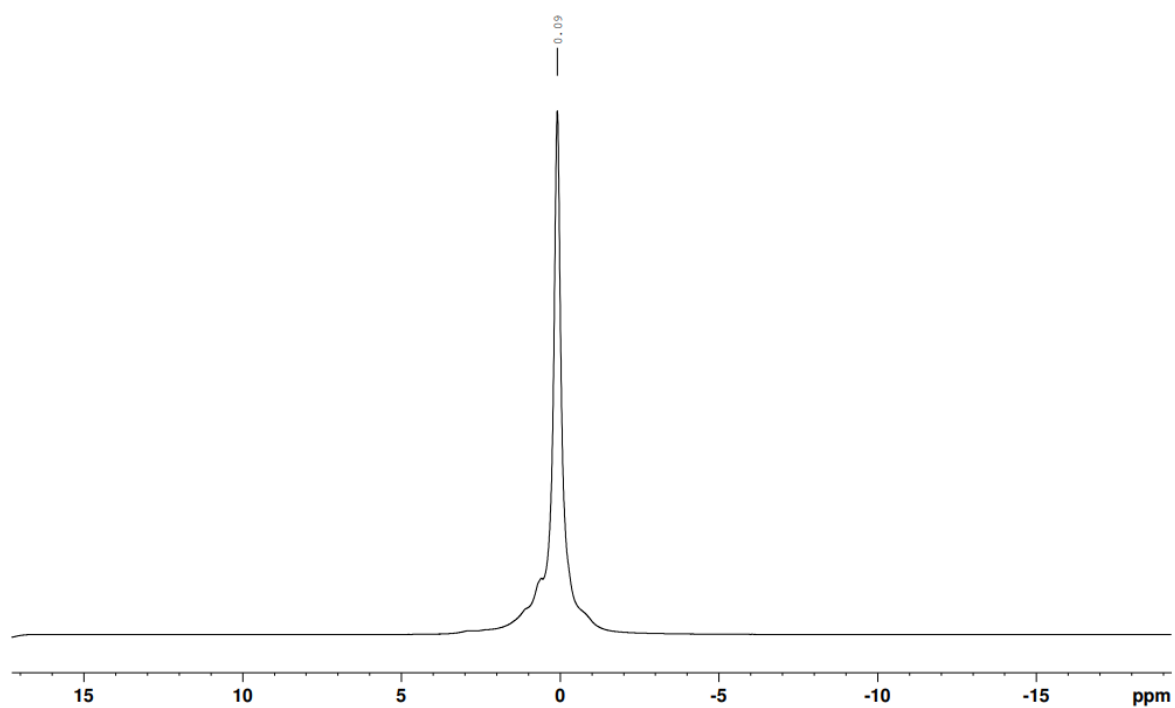

**Fig. S11:**  $^7\text{Li}$  NMR spectrum of compound **3**

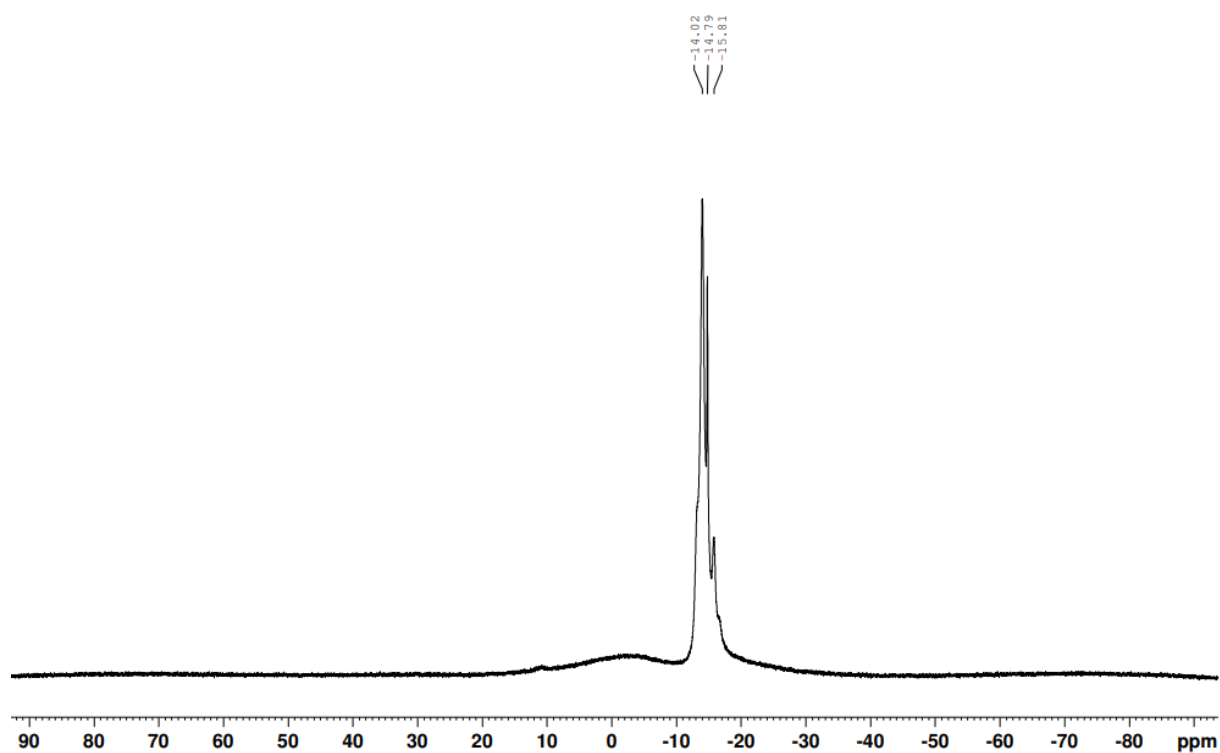

**Fig. S12:**  $^{11}\text{B}$  NMR spectrum of compound **2**

# Supporting Information

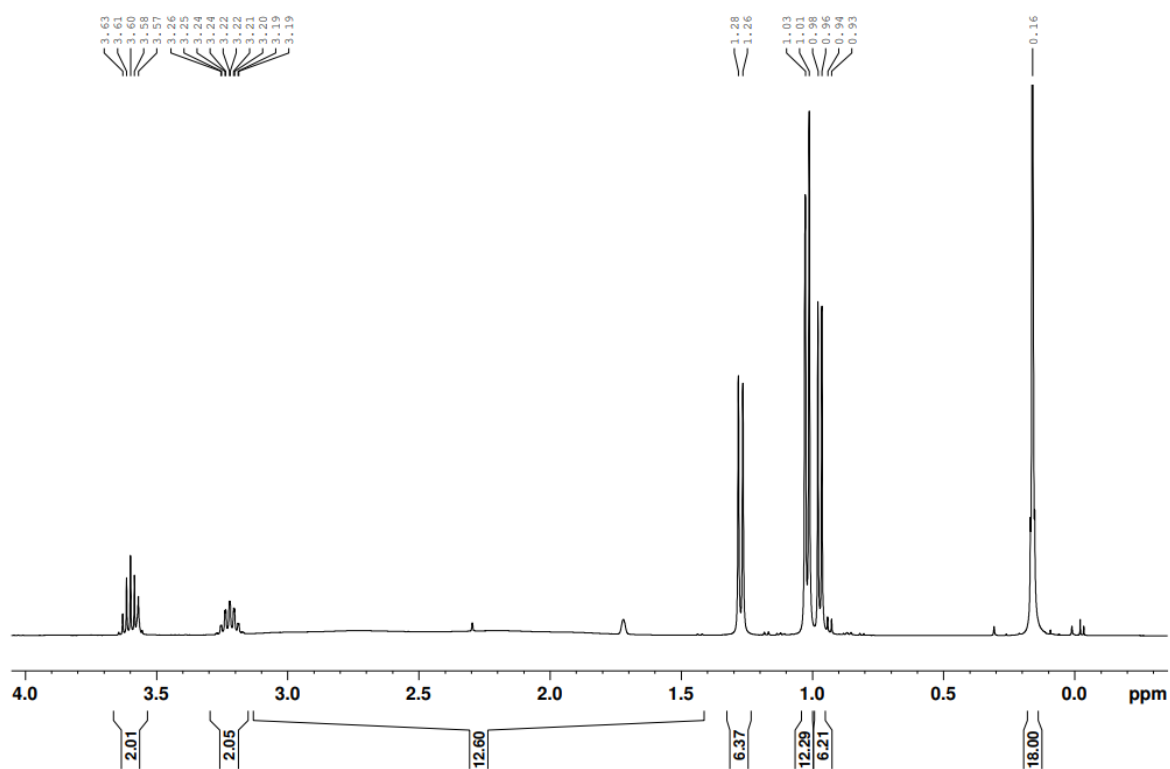

**Fig. S13:** <sup>1</sup>H NMR spectrum of compound 4

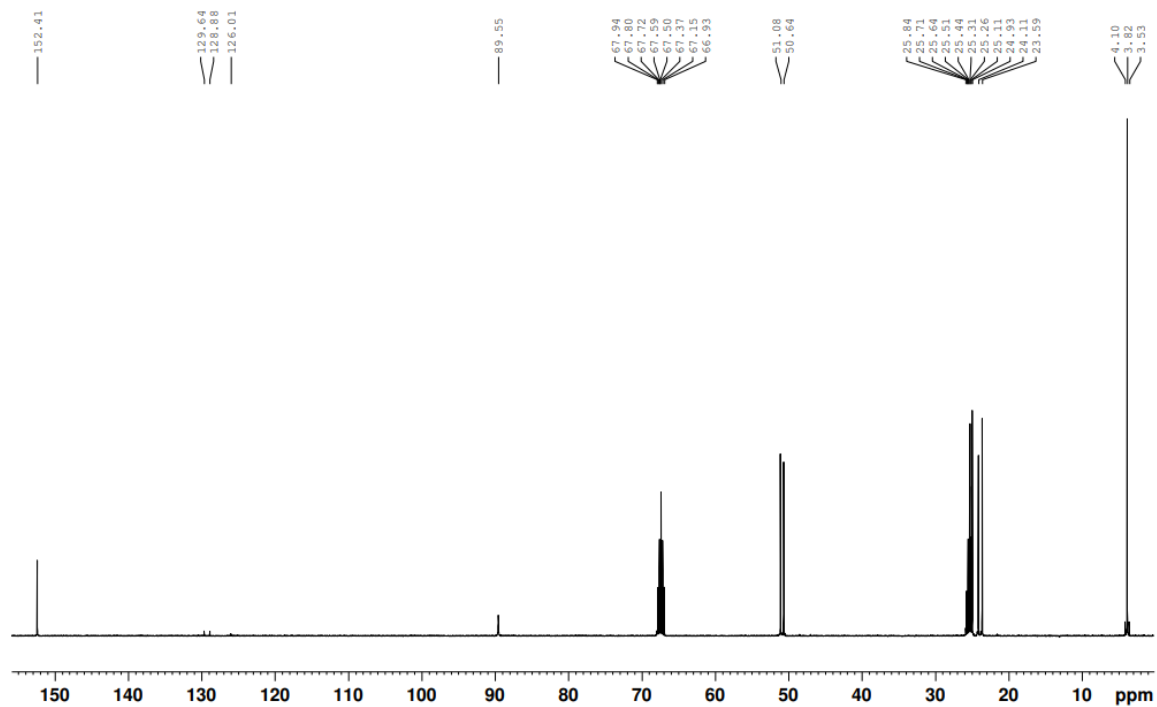

**Fig. S14:** <sup>13</sup>C NMR spectrum of compound 4

## Supporting Information

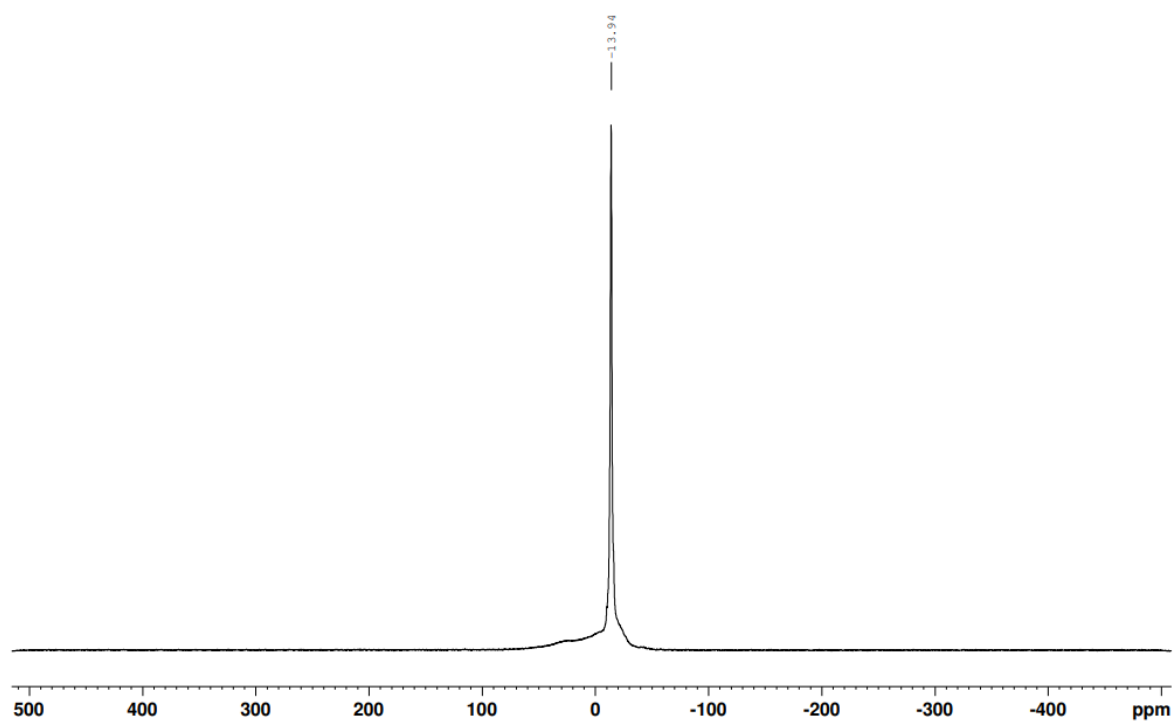

**Fig. S15:**  $^{11}\text{B}$  NMR spectrum of compound **4**

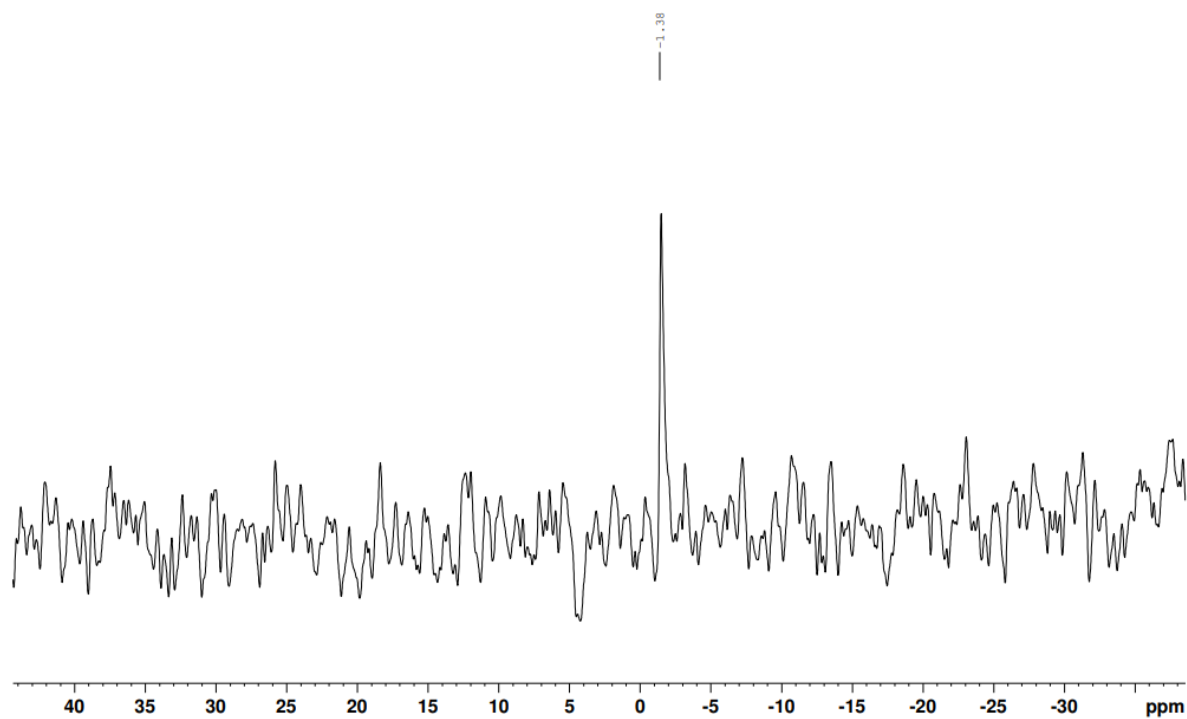

**Fig. S16:**  $^{29}\text{Si}$  NMR spectrum of compound **5**

## Supporting Information

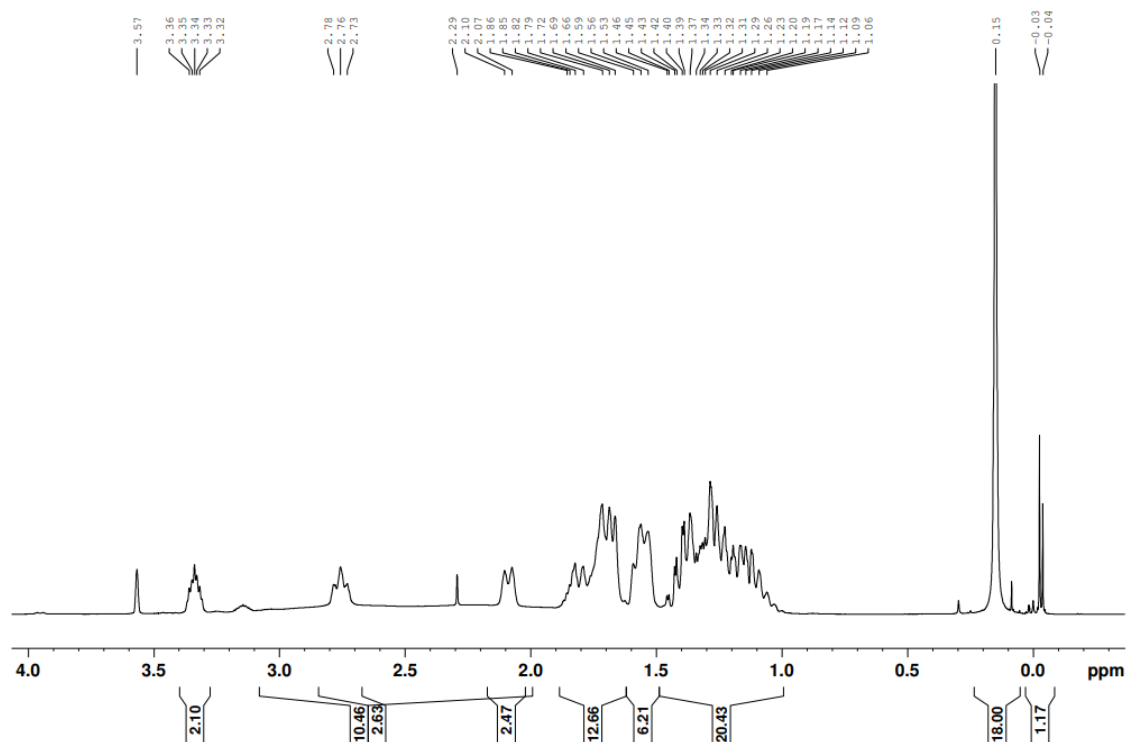

**Fig. S17:** <sup>1</sup>H NMR spectrum of compound 5

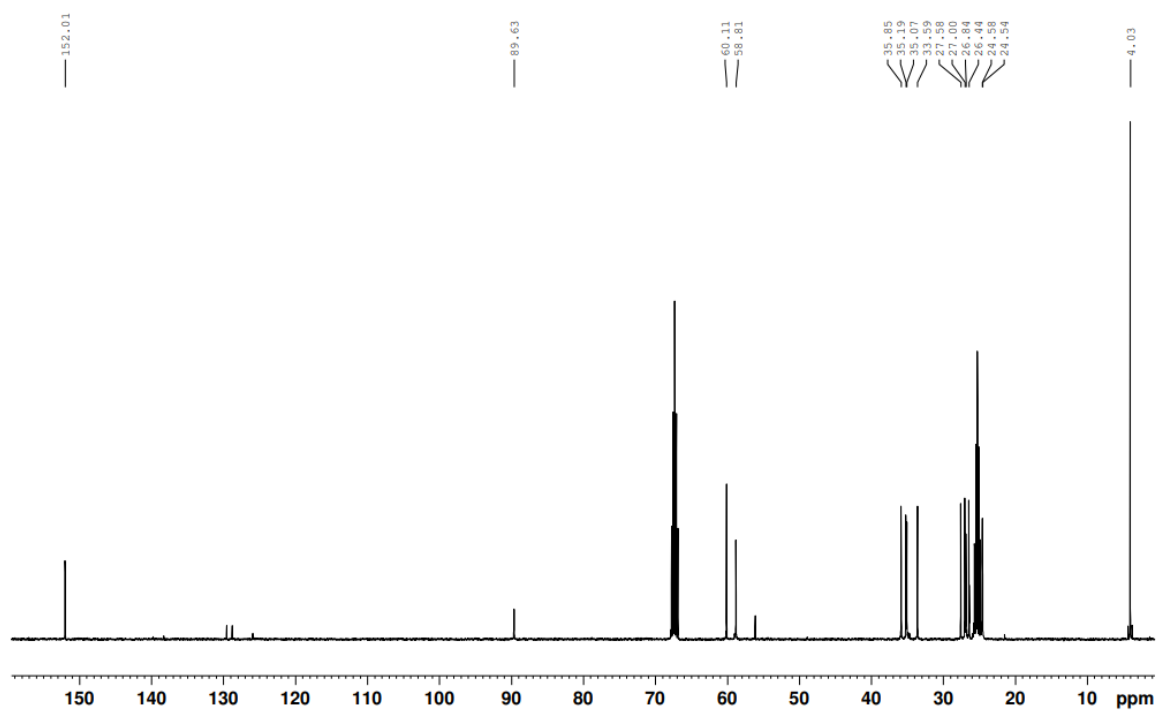

**Fig. S18:** <sup>13</sup>C NMR spectrum of compound 5

## Supporting Information

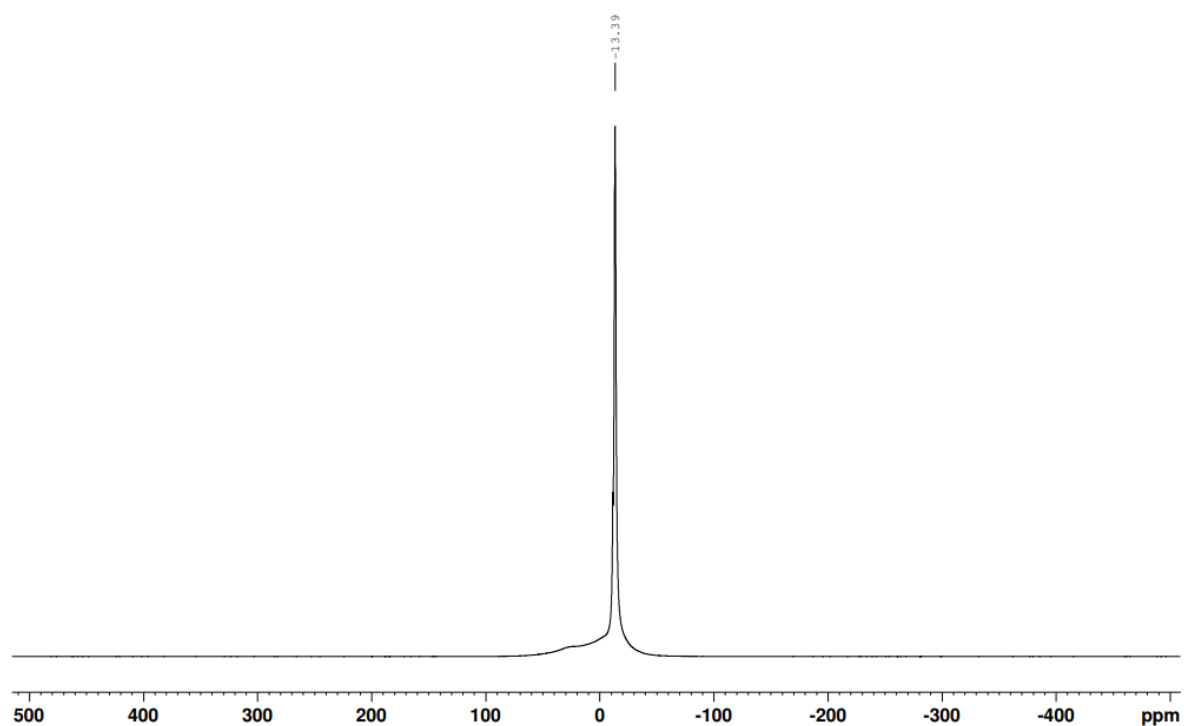

**Fig. S19:**  $^{11}\text{B}$  NMR spectrum of compound **5**

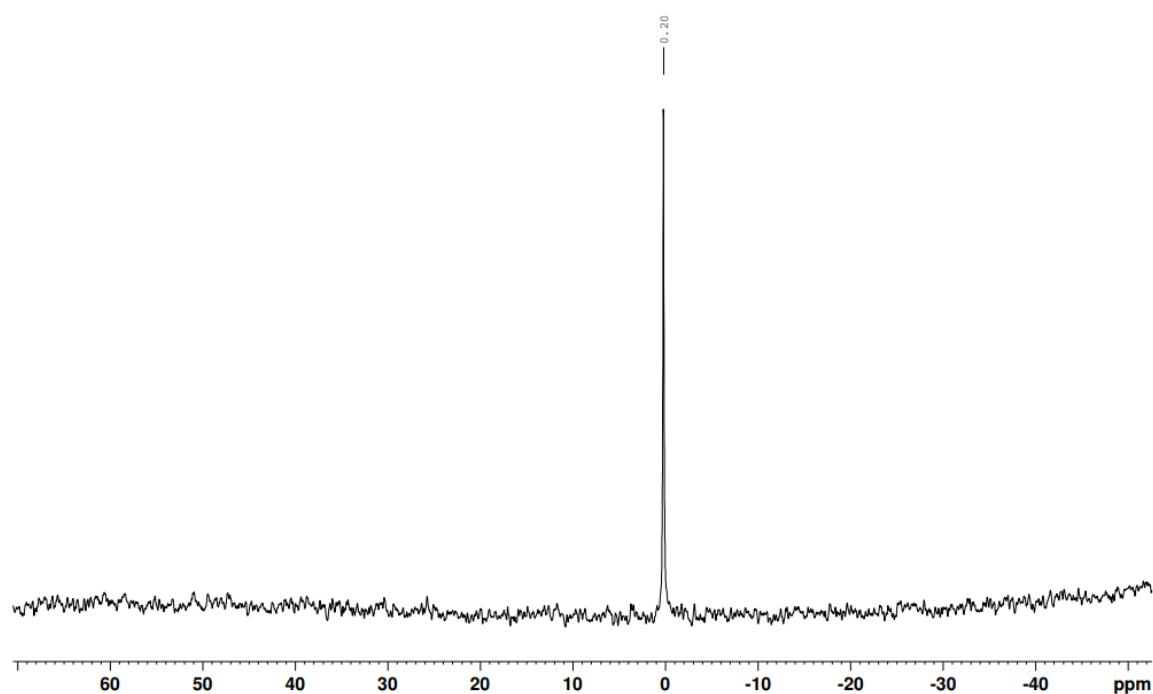

**Fig. S20:**  $^{29}\text{Si}$  NMR spectrum of compound **5**

## Supporting Information

### IV. Mass spectra

C:\Xcalibur\_alt\data\ac\_dnh\_118

5/9/2018 9:40:18 AM

C24H58B10Li2N4O4 Box

ac\_dnh\_118 #11 RT: 0.70 AV: 1 NL: 1.47E8

T: + c EI Full ms [ 49.50-650.50]

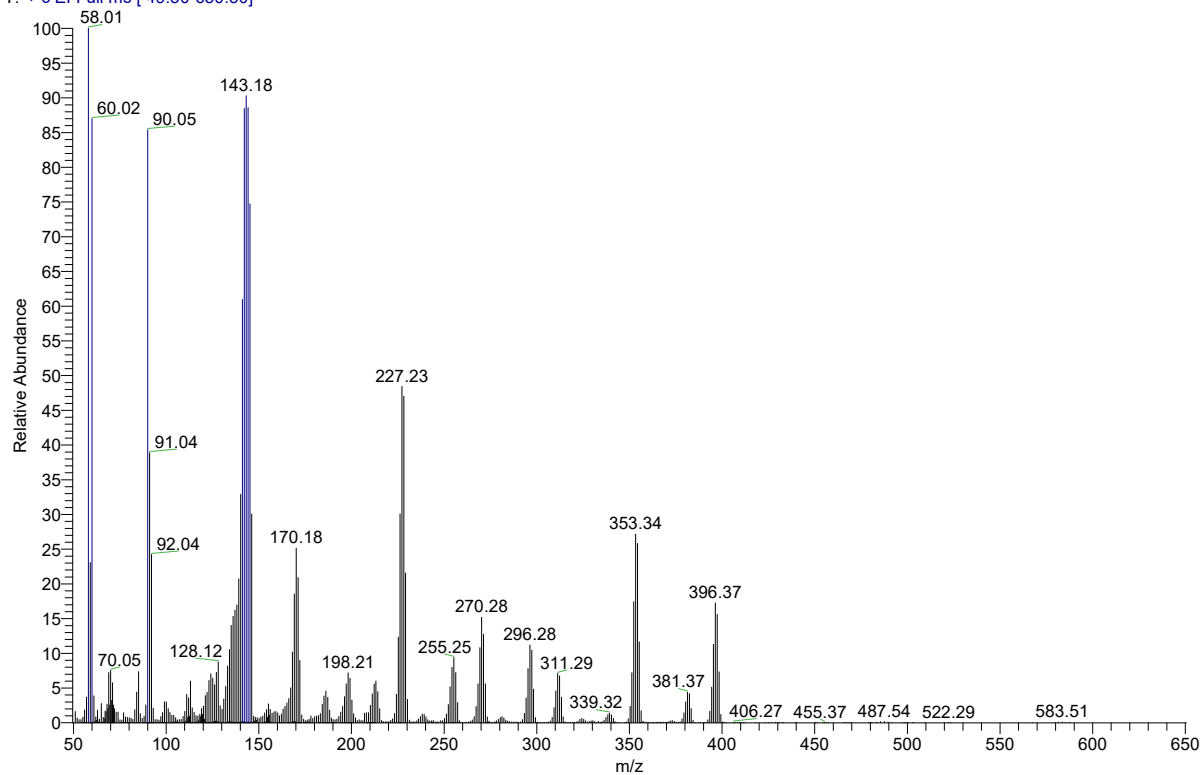

**Fig. S21.** Mass spectrum of compound **2**

## Supporting Information

C:\Xcalibur\_alt\data\ac\_dnh-112

6/8/2018 3:10:24 PM

C44H86B10Li2N4O4 Box

ac\_dnh-112 #26 RT: 1.53 AV: 1 NL: 1.22E8

T: + c EI Full ms [ 69.50-865.50]

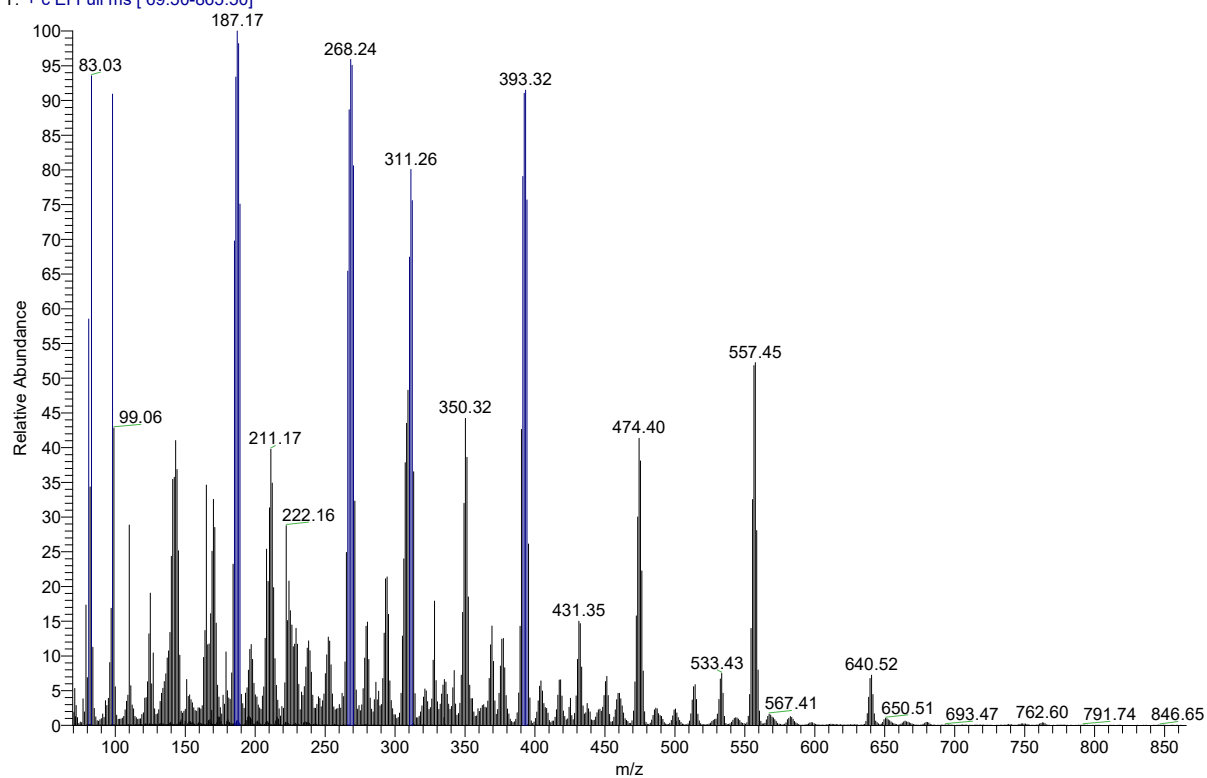

**Fig. S22.** Mass spectrum of compound **3**

## Supporting Information

C:\Xcalibur\_alt\data\ac\_dnh-119

8/28/2017 1:08:46 PM

C22H56B10N4Si2 Box

ac\_dnh-119 #26 RT: 0.98 AV: 1 NL: 1.36E8  
T: + c EI Full ms [ 59.50-600.50]

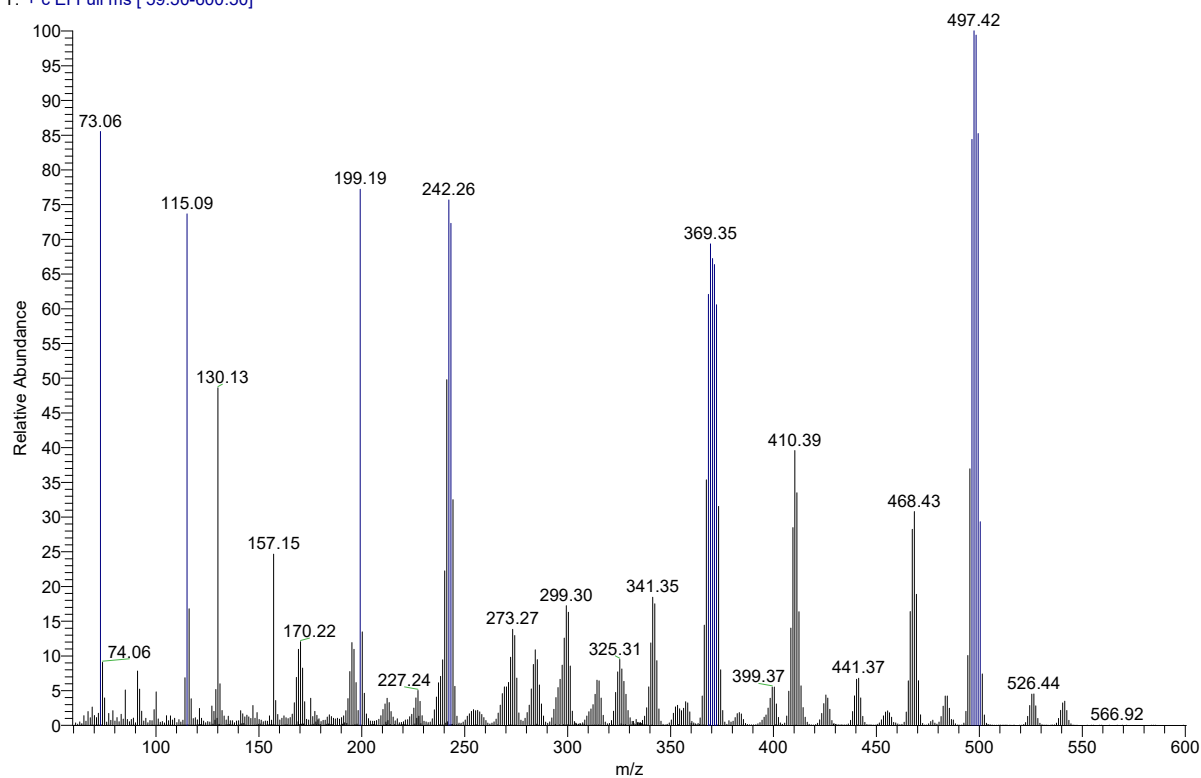

**Fig. S23.** Mass spectrum of compound 4



## Supporting Information

C:\Xcalibur\_alt\data\ac\_dnh\_113

7/12/2018 3:54:59 PM

C34H72B10N4Si2 Box

ac\_dnh\_113 #29 RT: 1.27 AV: 1 NL: 1.34E8  
T: + c EI Full ms [ 49.50-730.50]

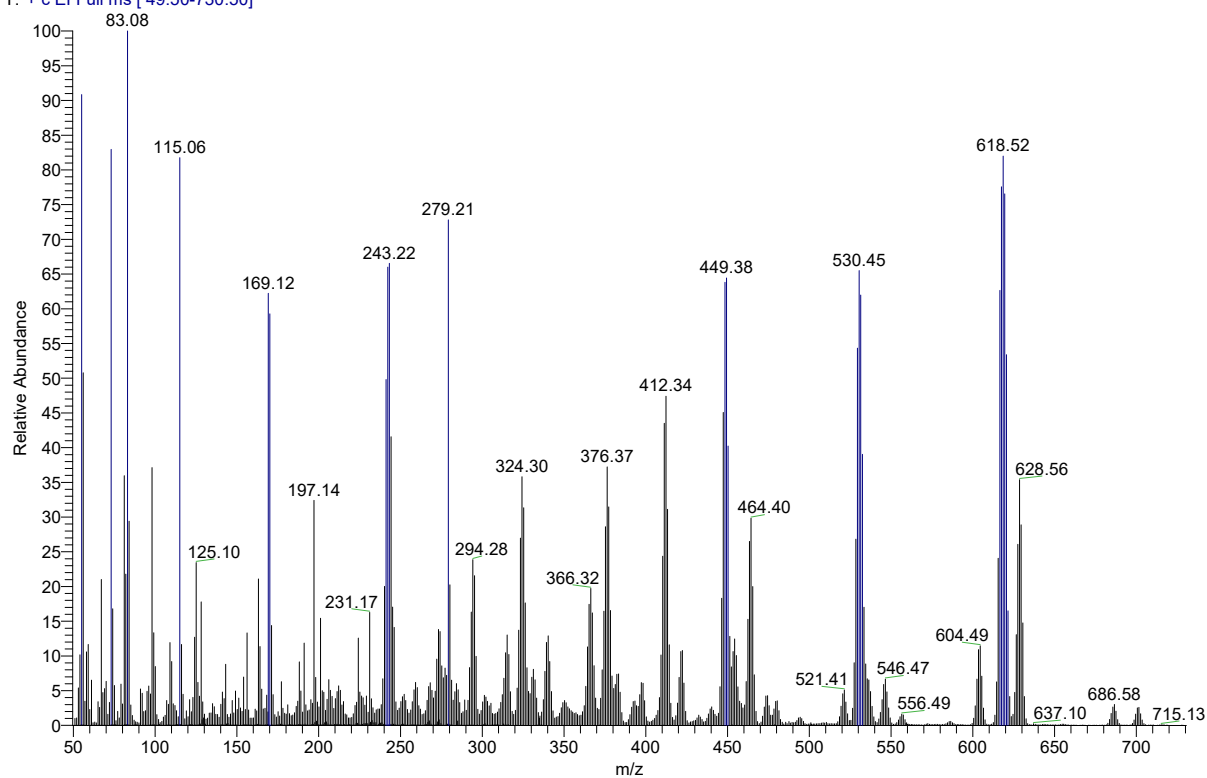

**Fig. S24.** Mass spectrum of compound 5

## Supporting Information

### V. Single-crystal X-ray diffraction data

#### Crystallographic Data and Details on Structure Refinement of Compound 3

|                                                               |                                                                                               |
|---------------------------------------------------------------|-----------------------------------------------------------------------------------------------|
| formula sum                                                   | C <sub>44</sub> H <sub>86</sub> B <sub>10</sub> Li <sub>2</sub> N <sub>4</sub> O <sub>4</sub> |
| formula weight                                                | 857.14                                                                                        |
| crystal size (mm)                                             | 0.18 x 0.33 x 0.48 mm                                                                         |
| crystal system                                                | triclinic                                                                                     |
| space group                                                   | $P\bar{1}$                                                                                    |
| unit cell parameters                                          |                                                                                               |
| <i>a</i> (Å)                                                  | 8.809(2)                                                                                      |
| <i>b</i> (Å)                                                  | 10.149(2)                                                                                     |
| <i>c</i> (Å)                                                  | 14.728(3)                                                                                     |
| <i>α</i> (deg)                                                | 89.48(3)                                                                                      |
| <i>β</i> (deg)                                                | 81.54(3)                                                                                      |
| <i>γ</i> (deg)                                                | 70.59(3)                                                                                      |
| unit cell volume <i>V</i> (Å <sup>3</sup> )                   | 1227.2(5)                                                                                     |
| molecules per cell <i>z</i>                                   | 1                                                                                             |
| crystallographic density <i>μ</i> calcd (g cm <sup>-3</sup> ) | 1.160                                                                                         |
| absorption coefficient <i>μ</i> (mm <sup>-1</sup> )           | 0.068                                                                                         |
| diffractometer                                                | STOE IPDS 2T                                                                                  |
| radiation (λ [Å])                                             | graphite-monochromated Mo-K <sub>α</sub> (0.71073)                                            |
| temperature (°C)                                              | −173(2)                                                                                       |
| scan type                                                     | ω scan (increment 1.5°, exposure 1 min)                                                       |
| completeness of dataset                                       | 0.992%                                                                                        |
| θ range of data collection (deg)                              | 2.481 to 26.000                                                                               |
| reflections collected                                         | 10451                                                                                         |
| independent reflections                                       | 4797                                                                                          |
| independent reflections with <i>I</i> > 2σ( <i>I</i> )        | 4015                                                                                          |
| structure solution method                                     | dual-space structure solution (SHELXT)                                                        |
| refinement method                                             | full-matrix least-squares on <i>F</i> <sup>2</sup> (SHELXL)                                   |
| absorption correction method                                  | none                                                                                          |
| data / parameters / restraints                                | 4797 / 294 / 0                                                                                |
| goodness of fit (GooF) [all data]                             | 1.027                                                                                         |
| final R values                                                |                                                                                               |
| <i>R</i> <sub>1</sub> [all data, <i>I</i> ≥ 2σ( <i>I</i> )]   | 0.0554, 0.0430                                                                                |
| <i>wR</i> <sub>2</sub> [all data, <i>I</i> ≥ 2σ( <i>I</i> )]  | 0.1083, 0.1030                                                                                |
| largest difference peak and hole                              | 0.445 and −0.171 eÅ <sup>-3</sup>                                                             |

## Supporting Information

### Crystallographic Data and Details on Structure Refinement of Compound 4

|                                                                     |                                                                                |
|---------------------------------------------------------------------|--------------------------------------------------------------------------------|
| formula sum                                                         | C <sub>22</sub> H <sub>54</sub> B <sub>10</sub> N <sub>4</sub> Si <sub>2</sub> |
| formula weight                                                      | 538.98                                                                         |
| crystal size (mm)                                                   | 0.20 x 0.20 x 0.20 mm                                                          |
| crystal system                                                      | Monoclinic                                                                     |
| space group                                                         | P 2 <sub>1</sub> /n                                                            |
| unit cell parameters                                                |                                                                                |
| <i>a</i> (Å)                                                        | 8.246(5)                                                                       |
| <i>b</i> (Å)                                                        | 14.278(4)                                                                      |
| <i>c</i> (Å)                                                        | 14.194(6)                                                                      |
| α (deg)                                                             | 90                                                                             |
| β (deg)                                                             | 98.29(4)                                                                       |
| γ (deg)                                                             | 90                                                                             |
| unit cell volume <i>V</i> (Å <sup>3</sup> )                         | 1653(1)                                                                        |
| molecules per cell <i>z</i>                                         | 4                                                                              |
| crystallographic density $\mu_{\text{calcd}}$ (g cm <sup>-3</sup> ) | 1.086                                                                          |
| absorption coefficient $\mu$ (mm <sup>-1</sup> )                    | 0.127                                                                          |
| diffractometer                                                      | STOE IPDS 2T                                                                   |
| radiation (λ [Å])                                                   | graphite-monochromated Mo-K <sub>α</sub> (0.71073)                             |
| temperature (°C)                                                    | −173(2)                                                                        |
| scan type                                                           | ω scan (increment 1.5°, exposure 15 min)                                       |
| completeness of dataset                                             | 99.3%                                                                          |
| θ range of data collection (deg)                                    | 2.034 to 29.145                                                                |
| reflections collected                                               | 22162                                                                          |
| independent reflections                                             | 4427                                                                           |
| independent reflections with <i>I</i> > 2σ( <i>I</i> )              | 4037                                                                           |
| structure solution method                                           | dual-space structure solution (SHELXT)                                         |
| refinement method                                                   | full-matrix least-squares on <i>F</i> <sup>2</sup> (SHELXL)                    |
| absorption correction method                                        | none                                                                           |
| data / restraints / parameters                                      | 4427 / 160 / 179                                                               |
| goodness of fit (GooF) [all data]                                   | 1.179                                                                          |
| final <i>R</i> values                                               |                                                                                |
| <i>R</i> <sub>1</sub> [all data, <i>I</i> ≥ 2σ( <i>I</i> )]         | 0.0516, 0.0452                                                                 |
| <i>wR</i> <sub>2</sub> [all data, <i>I</i> ≥ 2σ( <i>I</i> )]        | 0.1104, 0.1075                                                                 |
| largest difference peak and hole                                    | 0.351 and -0.245 eÅ <sup>-3</sup>                                              |
